# Supplementary material for: Assembling a double shell on a diatomite skeleton ternary complex with conductive polypyrrole for the enhancement of supercapacitors
Source: Royal Society of Chemistry journal article supplement (doi:10.1039/c9cc06791d), 2019-01-01
Supplement: c9cc06791d1.pdf [file c9cc06791d1.pdf]

## **Electronic Supplementary Information**

## Experimental Section

### Synthesis process of materials

**Materials.** All chemicals purchased from Aladdin were of analytical purity and used without further purification.

**Synthesis of MnO<sub>2</sub> nanosheets on Diatomite (D).** The diatomite@MnO<sub>2</sub> was assembled by a facile hydrothermal method. 40 mg diatomite and 35 mL 0.05 M KMnO<sub>4</sub> solution were added into a 50 mL autoclave. The Teflon-lined stainless steel autoclave was kept at 160 °C for 24 h in an oven. The samples were washed with distilled water and then dried at 60 °C for several hours. Finally, the MnO<sub>2</sub>@diatomite were obtained.

**Synthesis of FeOOH nanorods on Diatomite.** The preparation of FeOOH nanorods are completed via a simple hydrothermal method which is a redox action from MnO<sub>2</sub> to FeOOH. Firstly, 80 mg D@MnO<sub>2</sub> and 0.01 M 70 mL FeSO<sub>4</sub>•7H<sub>2</sub>O mixed solvent containing distilled water and ethylene glycol (V<sub>E</sub>/V<sub>D</sub> = 1/7) were moved into a Teflon-lined stainless steel autoclave and heated at 120 °C for 2 h in a rotating oven. Then, wash the solid precipitates with distilled water and dry at 60 °C for several hours. The D@α-Fe<sub>2</sub>O<sub>3</sub> and D@γ-Fe<sub>2</sub>O<sub>3</sub> were obtained by calcination in air at 350 °C and in N<sub>2</sub> at 500 °C for 2 h, respectively. The chemical reaction is shown in following Equation (1) and (2):

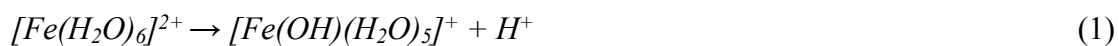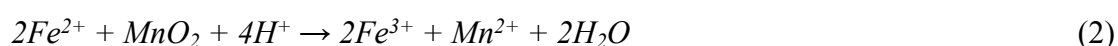

**PPy coating on composites.** The 200 mg samples (D@FeOOH, D@α-Fe<sub>2</sub>O<sub>3</sub> and D@γ-Fe<sub>2</sub>O<sub>3</sub>) and 40 mg FeCl<sub>3</sub>•6H<sub>2</sub>O were dissolved into a number of distilled water. After tired evenly, the mixture was dried in a oven. Then, the solid-state mixture and 3 mL pyrrole were transferred into two beaker, separately. The beakers were put into a sealed container and heated at 60 °C for 24 h by a water bath kettle. Finally, the D@FeOOH@PPy was collected by centrifugal washing.

### Material characterization

High resolution TEM (HRTEM) images were obtained on a JEOL-2100F TEM (JEOL, Japan) with an acceleration voltage of 200 kV. The crystallographic information and chemical compositions of the as-prepared nanostructures were established by powder X-ray diffraction (XRD, D/max 2500, Cu Kα), and they were analyzed with the JADE 6.0 software. The structures and morphologies of the as-prepared nanostructures

were measured by focused ion beam scanning electron microscopy (FIB/SEM, ZEISS AURIGA). The BET specific surface area was obtained by N<sub>2</sub> adsorption/desorption isotherms at 77 K (ASAP 2020 sorptometer). XPS spectra were acquired on a Physical Electronics ESCA 5600 spectrometer with a monochromatic Al K $\alpha$  X-ray source (power: 200 W/14 kV) and a multichannel detector (Omni IV).

### Electrochemical measurement

Electrochemical measurements of the samples were tested by using an electrochemical workstation (CHI 660E) with a three-electrode and a two-electrode configuration in 1 M Na<sub>2</sub>SO<sub>4</sub> electrolyte.

For three-electrode configuration, the active materials were used as a working electrode, and a Pt plate was used as a counter electrode, the standard calomel electrode (SCE) as a reference electrode. As for the working electrode, nickel foam (1×1.5 cm<sup>2</sup>) was used for a current collector with 1×1 cm<sup>2</sup> slurry on it, which is consist of active materials, carbon black and polyvinylidene fluoride (weight ratio=7:2:1) in N-methyl-2-pyrrolidone (NMP). The nickel foam with slurry was heated to evaporate the dissolvent in a vacuum oven at 120 °C for 12 h. All the samples were regarded as negative electrode with a potential of -0.8~0 V.

For the tests with a two-electrode configuration, the D@MnO<sub>2</sub>@PPy was used as the positive material and the D@FeOOH@PPy was used as the negative material. The galvanostatic charge-discharge measurement has an expanding potential window of 1.6 V.

The electrochemical properties of the three-electrode and two-electrode configuration were tested by cyclic voltammetry (CV) at scan rates of 10 to 200 mV s<sup>-1</sup> and galvanostatic charge-discharge (GCD) at current densities of 0.5 to 5 A g<sup>-1</sup>. The electrochemical impedance spectroscopy (EIS) experiments were carried out in the frequency range from 0.01 Hz to 100 kHz with a perturbation amplitude of 5 mV versus the open-circuit potential.

The specific capacitance C<sub>m</sub> (F g<sup>-1</sup>) and energy/power density are calculated by the following Equation (3-5):

$$C_m = \frac{I \times \Delta t}{m \times \Delta V} \quad (3)$$

$$E = 0.5 \times C_m \times \Delta V^2 / 3.6 \quad (4)$$

$$P = 3600 \times E / \Delta t \quad (5)$$

where I (A) is the discharging current,  $\Delta t$  (s) is the discharging time,  $\Delta V$  (V) is the potential window, m is the weight of active materials, E is the energy density and P is the power density.

The formula of mass loading between the positive and negative electrodes in two-electrode configuration is calculated by the following Equation (6) and (7):

$$Q = C \times \Delta V \times m \quad (6)$$

$$\frac{m_p}{m_n} = \frac{C_n \times \Delta V_n}{C_p \times \Delta V_p}$$

(7)

Where Q is quantity of electric charge, C is the specific capacitance,  $\Delta V$  is the potential window, m is the weight of active materials, p is positive and n is negative.

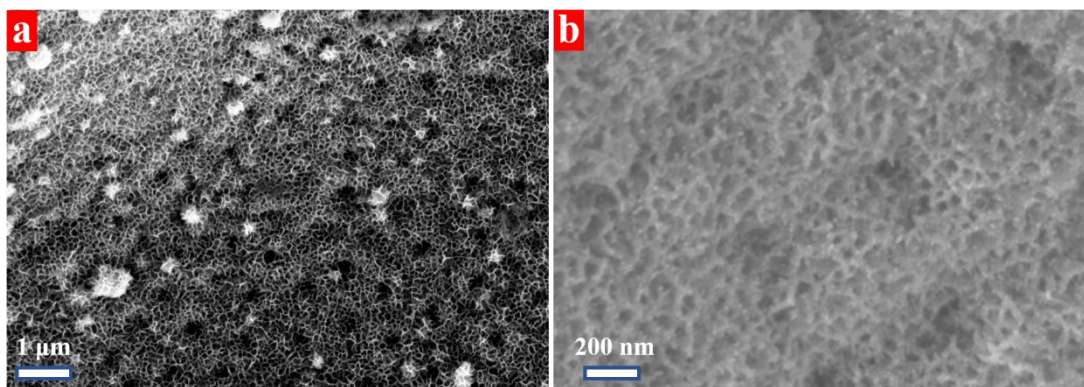

**Fig. S1** The SEM image of (a) D@MnO<sub>2</sub> nanosheets and (b) D@FeOOH nanorods materials.

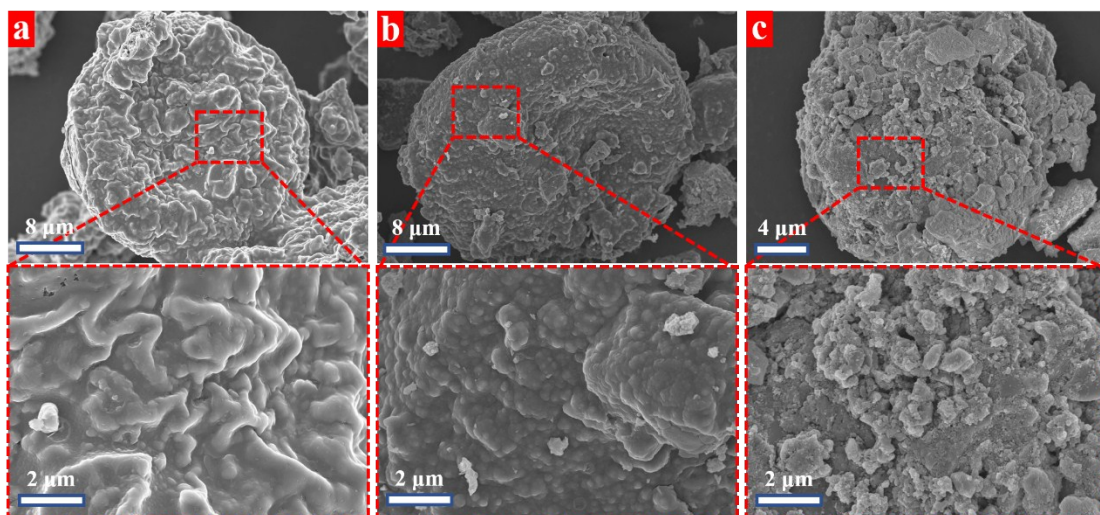

**Fig. S2** The SEM images and corresponding magnified images of (a) D@PPy, (b) D@α-Fe<sub>2</sub>O<sub>3</sub>@PPy and (c) D@γ-Fe<sub>2</sub>O<sub>3</sub>@PPy.

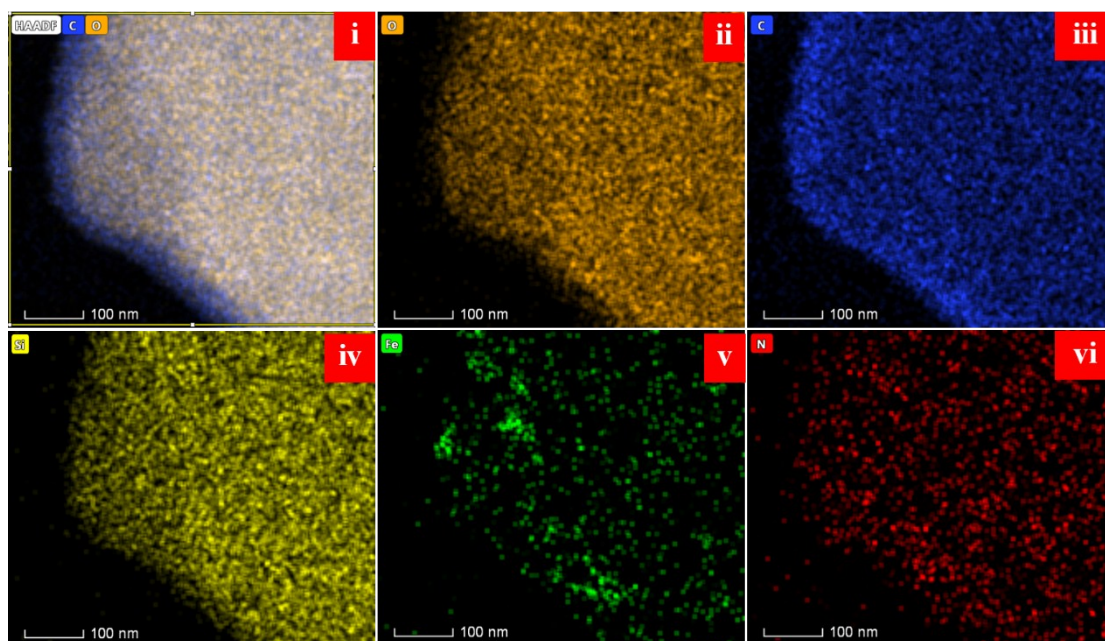

**Fig. S3** The EDS mapping of D@FeOOH@PPy: (i) C and O; (ii) O; (iii) C; (iv) Si; (v) Fe; (vi) N.

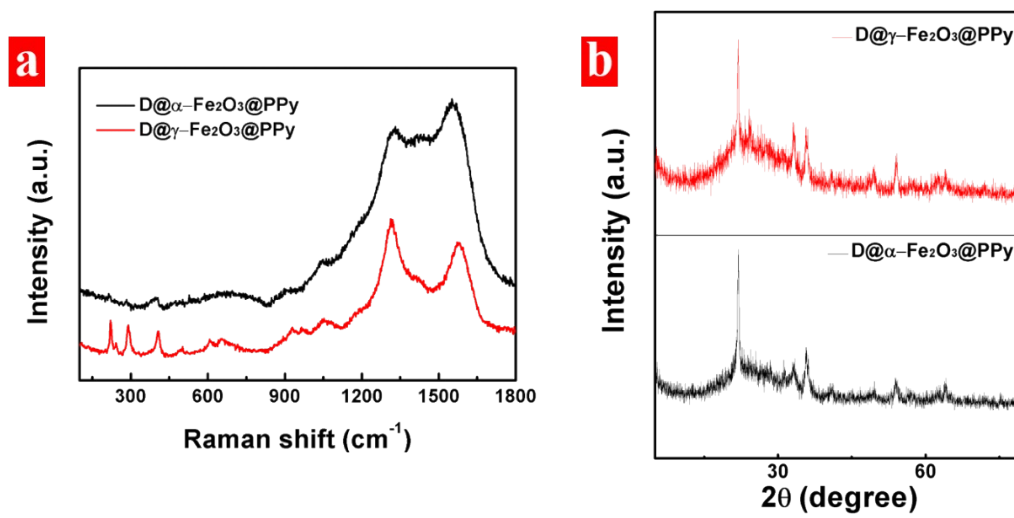

**Fig. S4** The (a) Raman and (b) XRD of  $\text{D}@ \alpha\text{-Fe}_2\text{O}_3@ \text{PPy}$  and  $\text{D}@ \gamma\text{-Fe}_2\text{O}_3@ \text{PPy}$

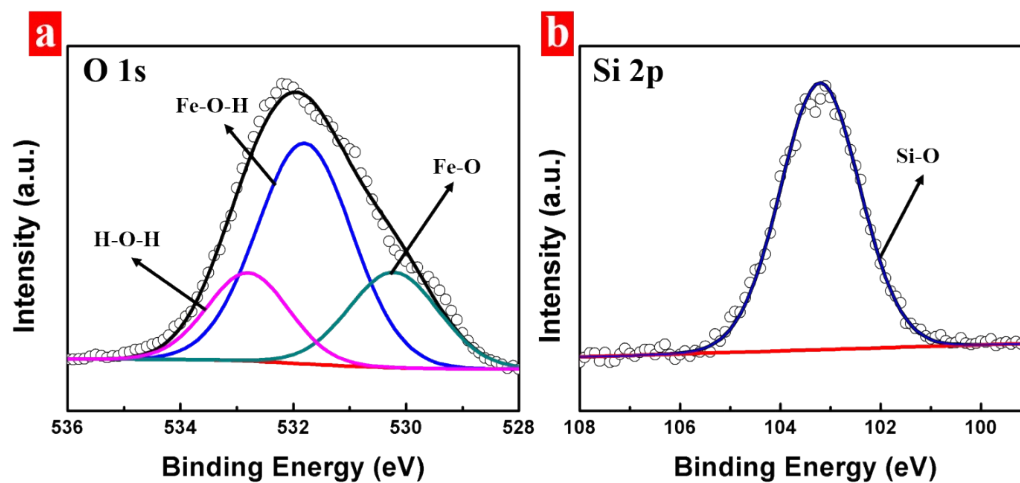

Fig. S5 The XPS of D@FeOOH@PPy : (a) O 1s and (b) Si 2p

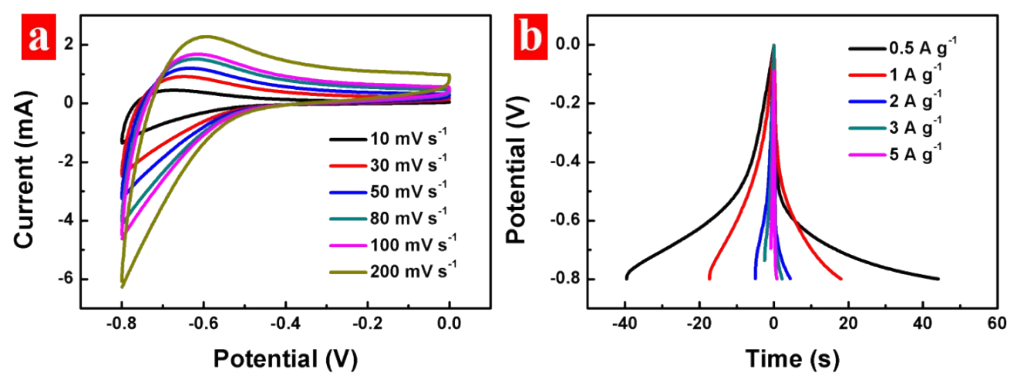

**Fig. S6** The (a) CV curves at different scan rates and (b) CC curves at different current density of D@FeOOH.

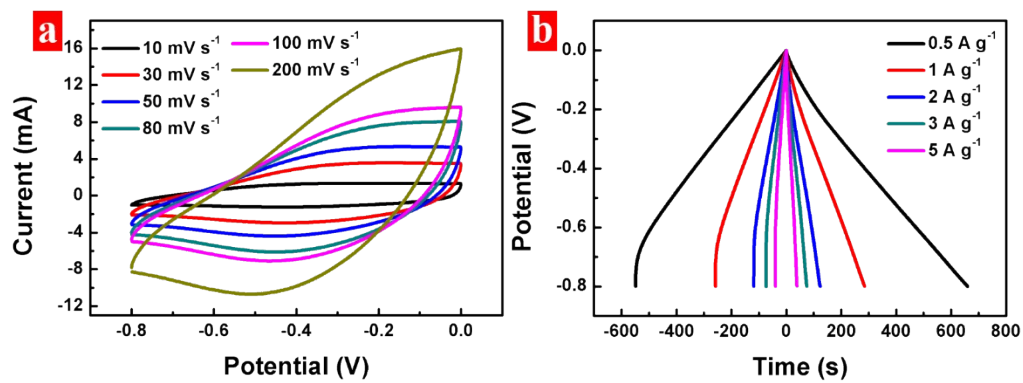

**Fig. S7** The (a) CV curves at different scan rates and (b) CC curves at different current density of D@FeOOH@PPy.

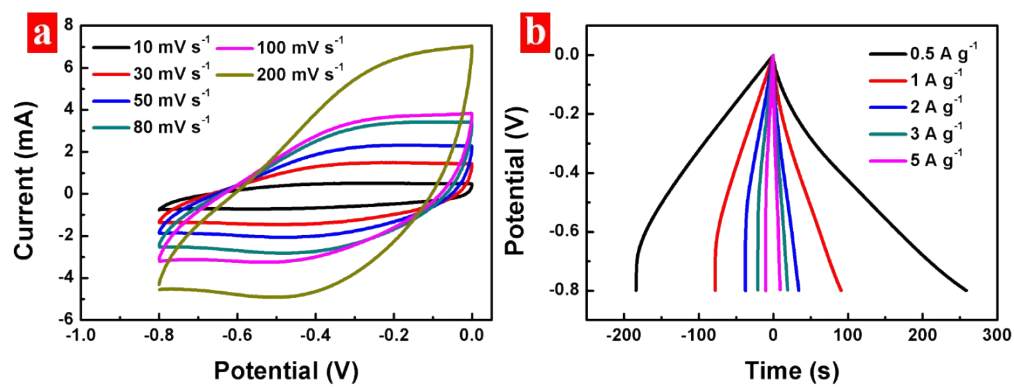

**Fig. S8** The (a) CV curves at different scan rates and (b) CC curves at different current density of D@ $\alpha$ -Fe<sub>2</sub>O<sub>3</sub>@PPy.

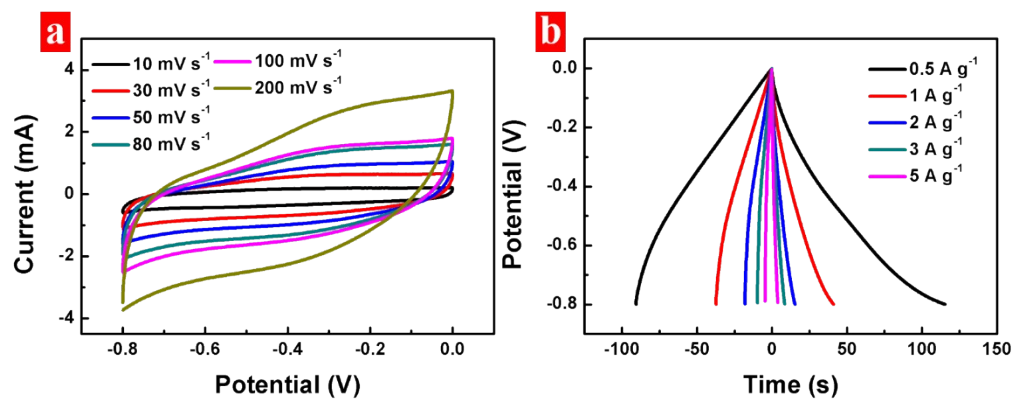

**Fig. S9** The (a) CV curves at different scan rates and (b) CC curves at different current density of  $D@ \gamma\text{-Fe}_2\text{O}_3@ \text{PPy}$ .

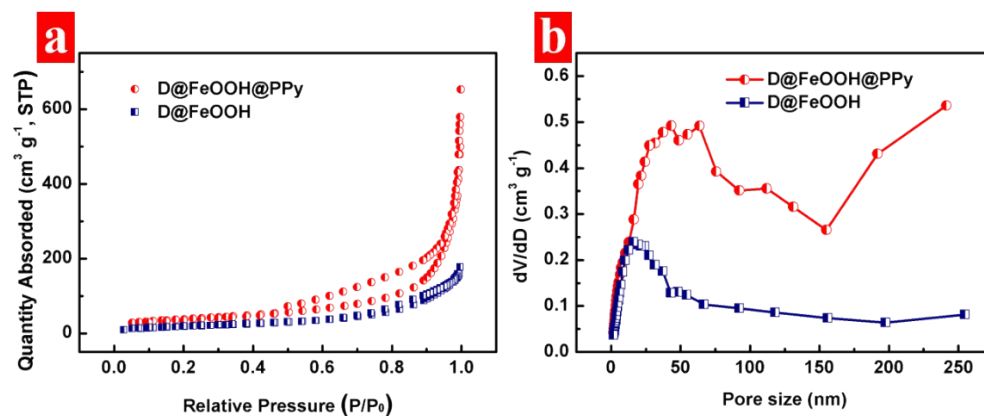

**Fig. S10** The (a) N<sub>2</sub> adsorption/desorption isotherms and (b) Pore size distribution curves of D@FeOOH@PPy and D@FeOOH.

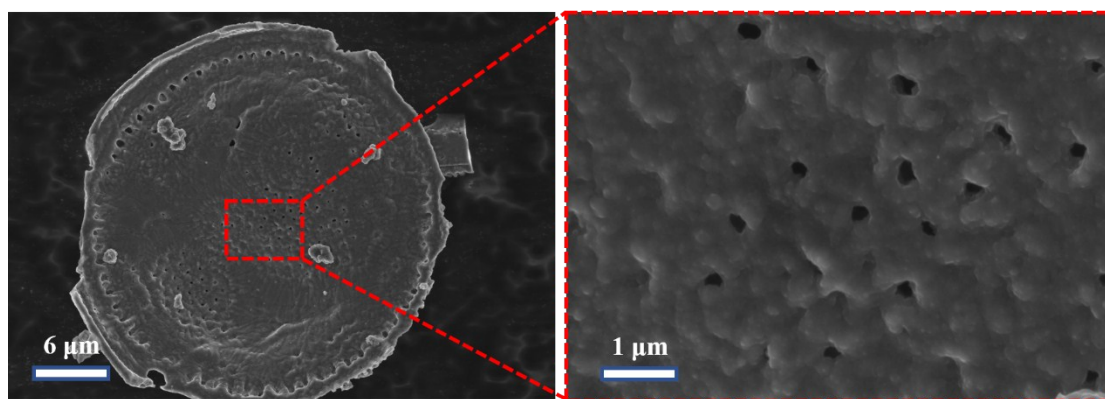

**Fig. S11** The SEM image of D@FeOOH@PPy electrode material after 10000 cycles with low and high magnification.

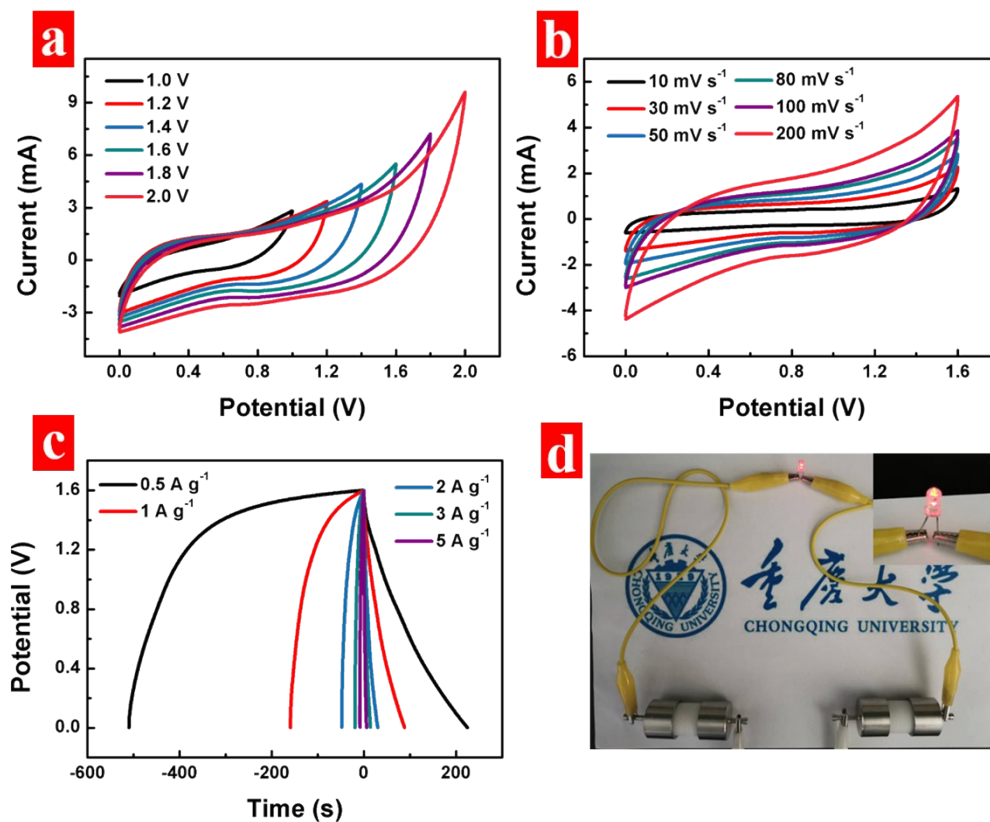

**Fig. S12** (a) CV curves of  $\text{D@FeOOH@PPy//D@MnO}_2\text{@PPy}$  with different potential. (b) CV curves of  $\text{D@FeOOH@PPy//D@MnO}_2\text{@PPy}$  with different scan rates. (c) CC curves of  $\text{D@FeOOH@PPy//D@MnO}_2\text{@PPy}$  with different current densities. (d) The red LED lighted by the device.
